# Supplementary material for: Radiomics Analysis on Gadoxetate Disodium-Enhanced MRI Predicts Response to Transarterial Embolization in Patients with HCC
Source: MDPI journal article supplement (doi:10.3390/diagnostics12061308), 2022-05-24
Supplement: s1 [file s1]

| <b>Parameters</b>            | <b>Signa Excite,<br/>GE Healthcare</b> | <b>Achieva,<br/>Philips Healthcare</b> |
|------------------------------|----------------------------------------|----------------------------------------|
| Repetition Time (ms)         | 3.8                                    | 4.4                                    |
| Echo Time (ms)               | 1.8                                    | 2.1                                    |
| Flip Angle (degrees)         | 12                                     | 10                                     |
| Number of slices             | 92–116                                 | 83–110                                 |
| Slice Thickness (mm)         | 4.4                                    | 5                                      |
| Reconstruction Interval (mm) | 2.2                                    | 2.3                                    |
| Acquisition Matrix           | 256 x 256                              | 270 x 188                              |
| Field of View (mm)           | 350–400 x 350–400                      | 350–400 x 350–400                      |
| Number of Excitations        | 0.71                                   | 1                                      |

**Supplementary Table S1:** Acquisition parameters of post-contrast axial T1-weighted three-dimensional gradient-recalled echo sequences with fat suppression at 1.5T MRI scanners.

|              | Prediction of complete response  |                | Prediction of objective response                     |                |
|--------------|----------------------------------|----------------|------------------------------------------------------|----------------|
|              | Feature                          | <i>p</i> value | Feature                                              | <i>p</i> value |
| <b>PVP</b>   | original_glszm_SmallAreaEmphasis | 0.017          | wavelet-HHL_glszm_SizeZoneNonUniformityNormalized    | 0.049          |
|              | wavelet.LHH_firstorder_Skewness  | 0.011          |                                                      |                |
| <b>3' TP</b> | Platelet count                   | 0.023          | wavelet.HLL_glcmm_ClusterShade                       | 0.027          |
|              | TP hypointensity                 | 0.030          | wavelet.LHH_glszm_SmallAreaEmphasis                  | 0.044          |
|              | wavelet.LLH_ngtdm_Strength       | 0.038          | wavelet.LLH_firstorder_Mean                          | 0.020          |
| <b>HBP</b>   | Platelet count                   | 0.034          | TP hypointensity                                     | 0.034          |
|              | wavelet.HHH_firstorder_Skewness  | 0.027          | original_glszm_LargeAreaHighGrayLevelEmphasis        | 0.044          |
|              | wavelet.LLH_glcmm_Correlation    | 0.031          | wavelet.HHL_glcmm_Idmn                               | 0.041          |
|              |                                  |                | wavelet.HHL_ngtdm_Contrast                           | 0.022          |
|              |                                  |                | wavelet.LHL_glcmm_Imc1                               | 0.012          |
|              |                                  |                | wavelet.LHL_glcmm_Imc2                               | 0.014          |
|              |                                  |                | wavelet.LHL_gldm_LargeDependenceLowGrayLevelEmphasis | 0.049          |

**Supplementary Table S2:** Most discriminant features identified by using a first features selection performed identified by the statistical model by a logistic regression with elastic net penalty (radiomics model 1), while the final model was a logistic model with ridge penalty on the selected features in order to find an uncorrelated solution of clinical variables for reduction and selection of clinical variables, LI-RADS qualitative features, and radiomics features according to the post-treatment response. **Abbreviations:** PVP: Portal Venous Phase; 3' TP: 3 minutes Transitional Phase; HBP: Hepatobiliary Phase.

|              | Prediction of complete response  |                   | Prediction of objective response          |                   |
|--------------|----------------------------------|-------------------|-------------------------------------------|-------------------|
|              | Feature                          | <i>p</i><br>value | Feature                                   | <i>p</i><br>value |
| <b>PVP</b>   | wavelet-LLH_glcM_Imc2            | 0.002             | wavelet-                                  | <                 |
|              | wavelet-LLH_glcM_MCC             | 0.005             | HHL_glszm_SizeZoneNonUniformityNormalized | 0.001             |
|              |                                  |                   | wavelet-HHL_glcM_MCC                      | <                 |
|              |                                  |                   | wavelet-HHL_glcM_Imc2                     | 0.001             |
| <b>3' TP</b> | wavelet-                         | 0.009             | wavelet-LHH_gldm_LowGrayLevelEmphasis     | 0.009             |
|              | HLH_gldm_DependenceVariance      | 0.005             | wavelet-LHH_glrM_LowGrayLevelRunEmphasis  | 0.030             |
|              | wavelet-LLH_firstorder_Median    | <                 |                                           |                   |
|              | Platelet count                   | 0.001             |                                           |                   |
| <b>HBP</b>   | wavelet-HHL_glcM_Correlation     | 0.001             |                                           |                   |
|              | wavelet-HLH_glcM_Imc1            | 0.002             | wavelet-LLL_firstorder_Kurtosis           | 0.021             |
|              | wavelet-HHH_firstorder_Skewness  | <                 | original_firstorder_Kurtosis              | 0.041             |
|              | wavelet-HHH_glcM_Correlation     | 0.001             |                                           |                   |
|              | wavelet-HHH_glcM_InverseVariance | <                 |                                           |                   |
|              |                                  | 0.001             |                                           |                   |
|              |                                  | <                 |                                           |                   |
|              |                                  | 0.001             |                                           |                   |

**Supplementary Table S3:** Most discriminant features identified by the computational system based on point-biserial-correlation coefficient (radiomics model 2) for reduction and selection of clinical variables, LI-RADS qualitative features, and radiomics features according to post-treatment response. **Abbreviations:** PVP: Portal Venous Phase; 3' TP: 3 minutes Transitional Phase; HBP: Hepatobiliary Phase.
